# Supplementary material
Source: PubMed Central journal article supplement (PMC4385179)
Supplement: mmc1.pdf [file mmc1.pdf]

The American Journal of Human Genetics

Supplemental Data

## **Absence of Heterozygosity due to Template Switching during Replicative Rearrangements**

**Claudia M.B. Carvalho, Rolph Pfundt, Daniel A. King, Sarah J. Lindsay, Luciana W. Zuccherato, Merryn V.E. Macville, Pengfei Liu, Diana Johnson, Pawel Stankiewicz, Chester W. Brown, DDD Study, Chad A. Shaw, Matthew E. Hurles, Grzegorz Ira, P.J. Hastings, Han G. Brunner, and James R. Lupski**

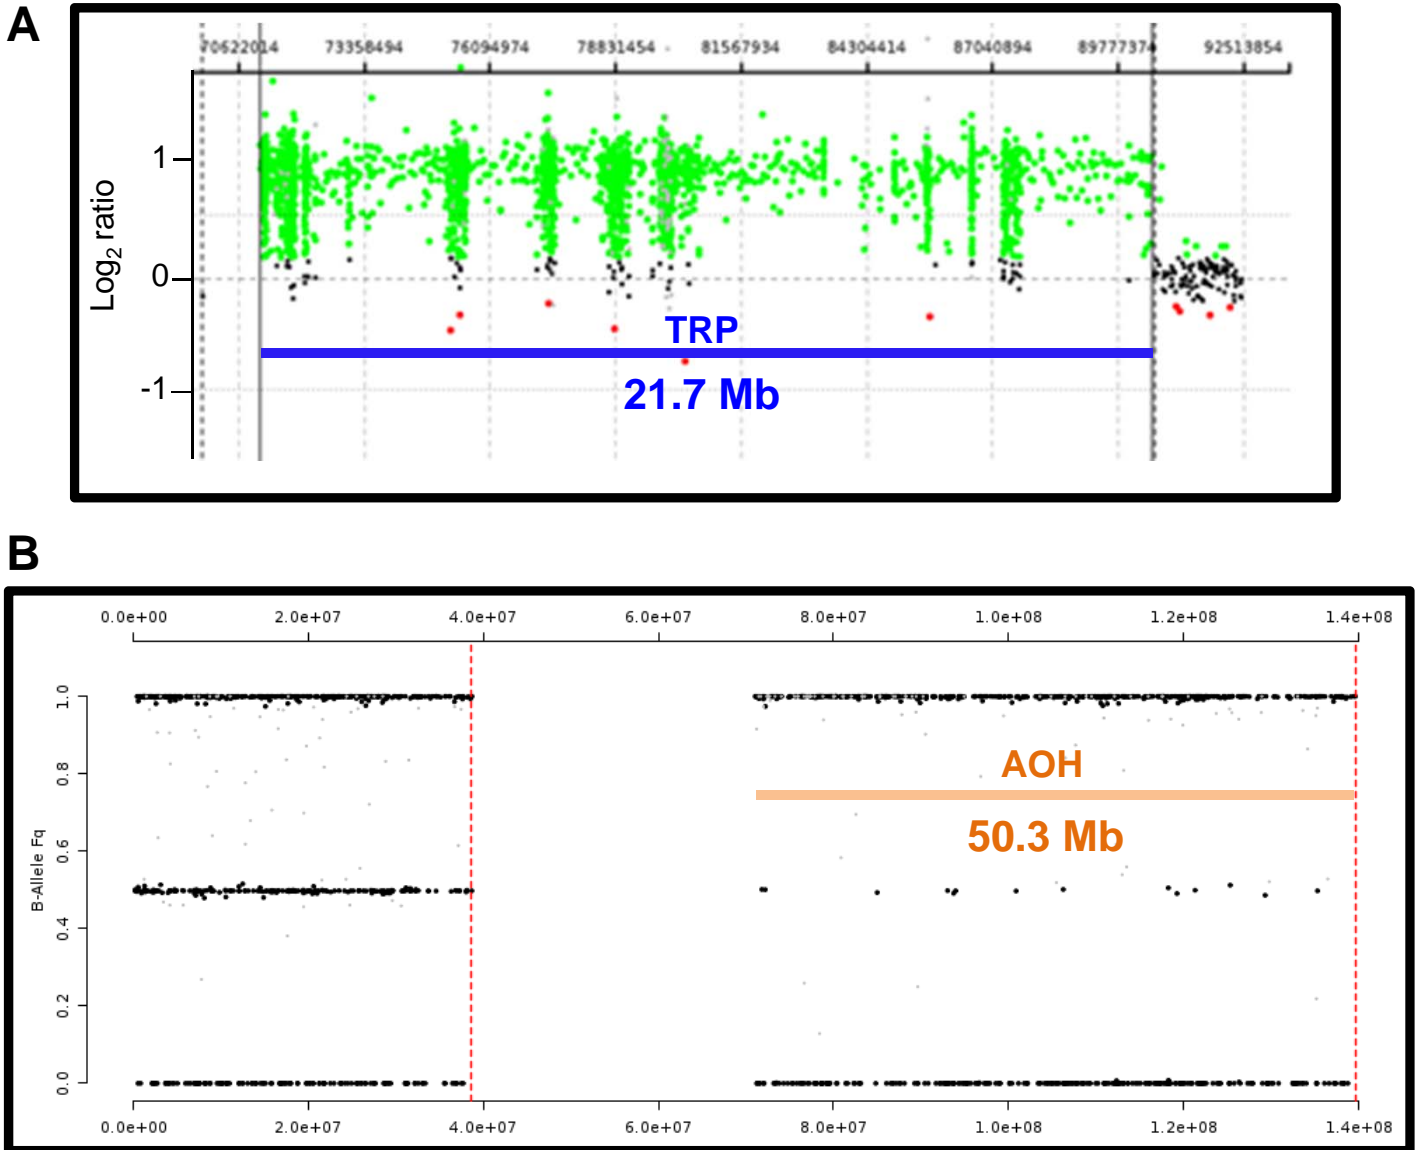

**Figure S1** – Additional results for individual BAB4539. **(A)** Result of Agilent customized aCGH (MGL V9.1) of chromosome 9q region harboring a 21.7 Mb triplication ( $\log_2$  ratio  $\sim 1$ ). This array includes SNP probes to detect regions with absence of heterozygosity (AOH). **(B)** SNP array data (B-allele frequency) for chromosome 9 showing 50.3 Mb of AOH from end of triplicated segment to the telomere.

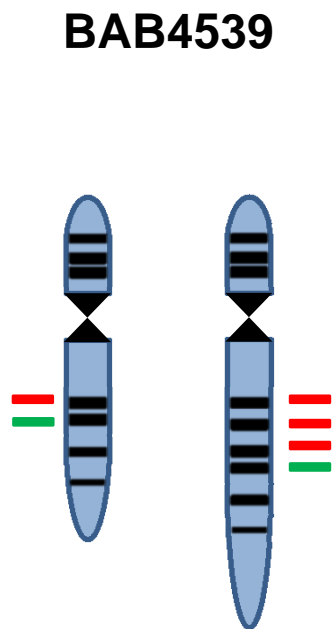

**Chromosome 9**

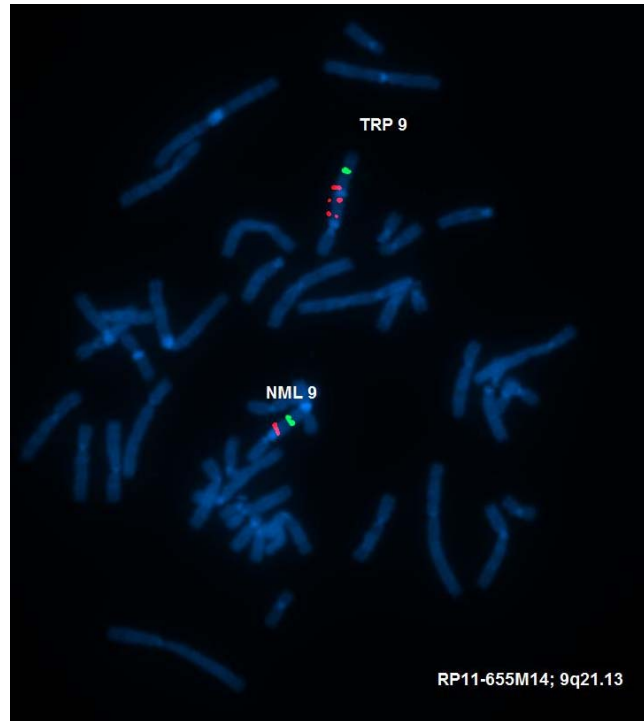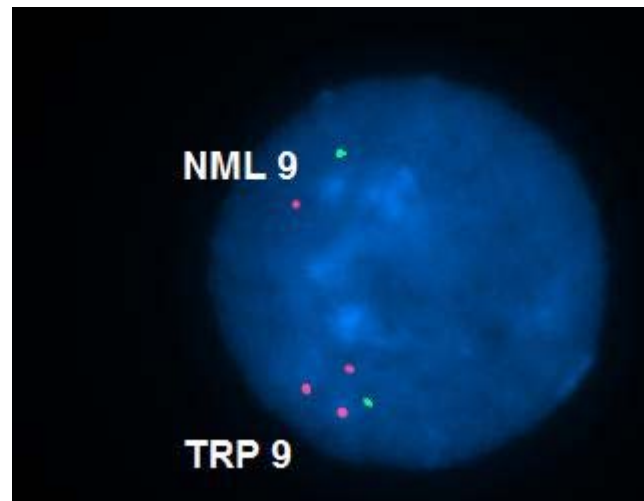

**Figure S2.** FISH result for subject BAB4539 indicates intrachromosomal triplication: three evenly spaced fluorescent signals for the triplicated segments are arranged along 9q21.13. Metaphase FISH was performed using BAC probes RP11-655M14 (test, red) and RP11-338N12 (control, green). Approximate locations of probes in 9q arm are schematically shown.

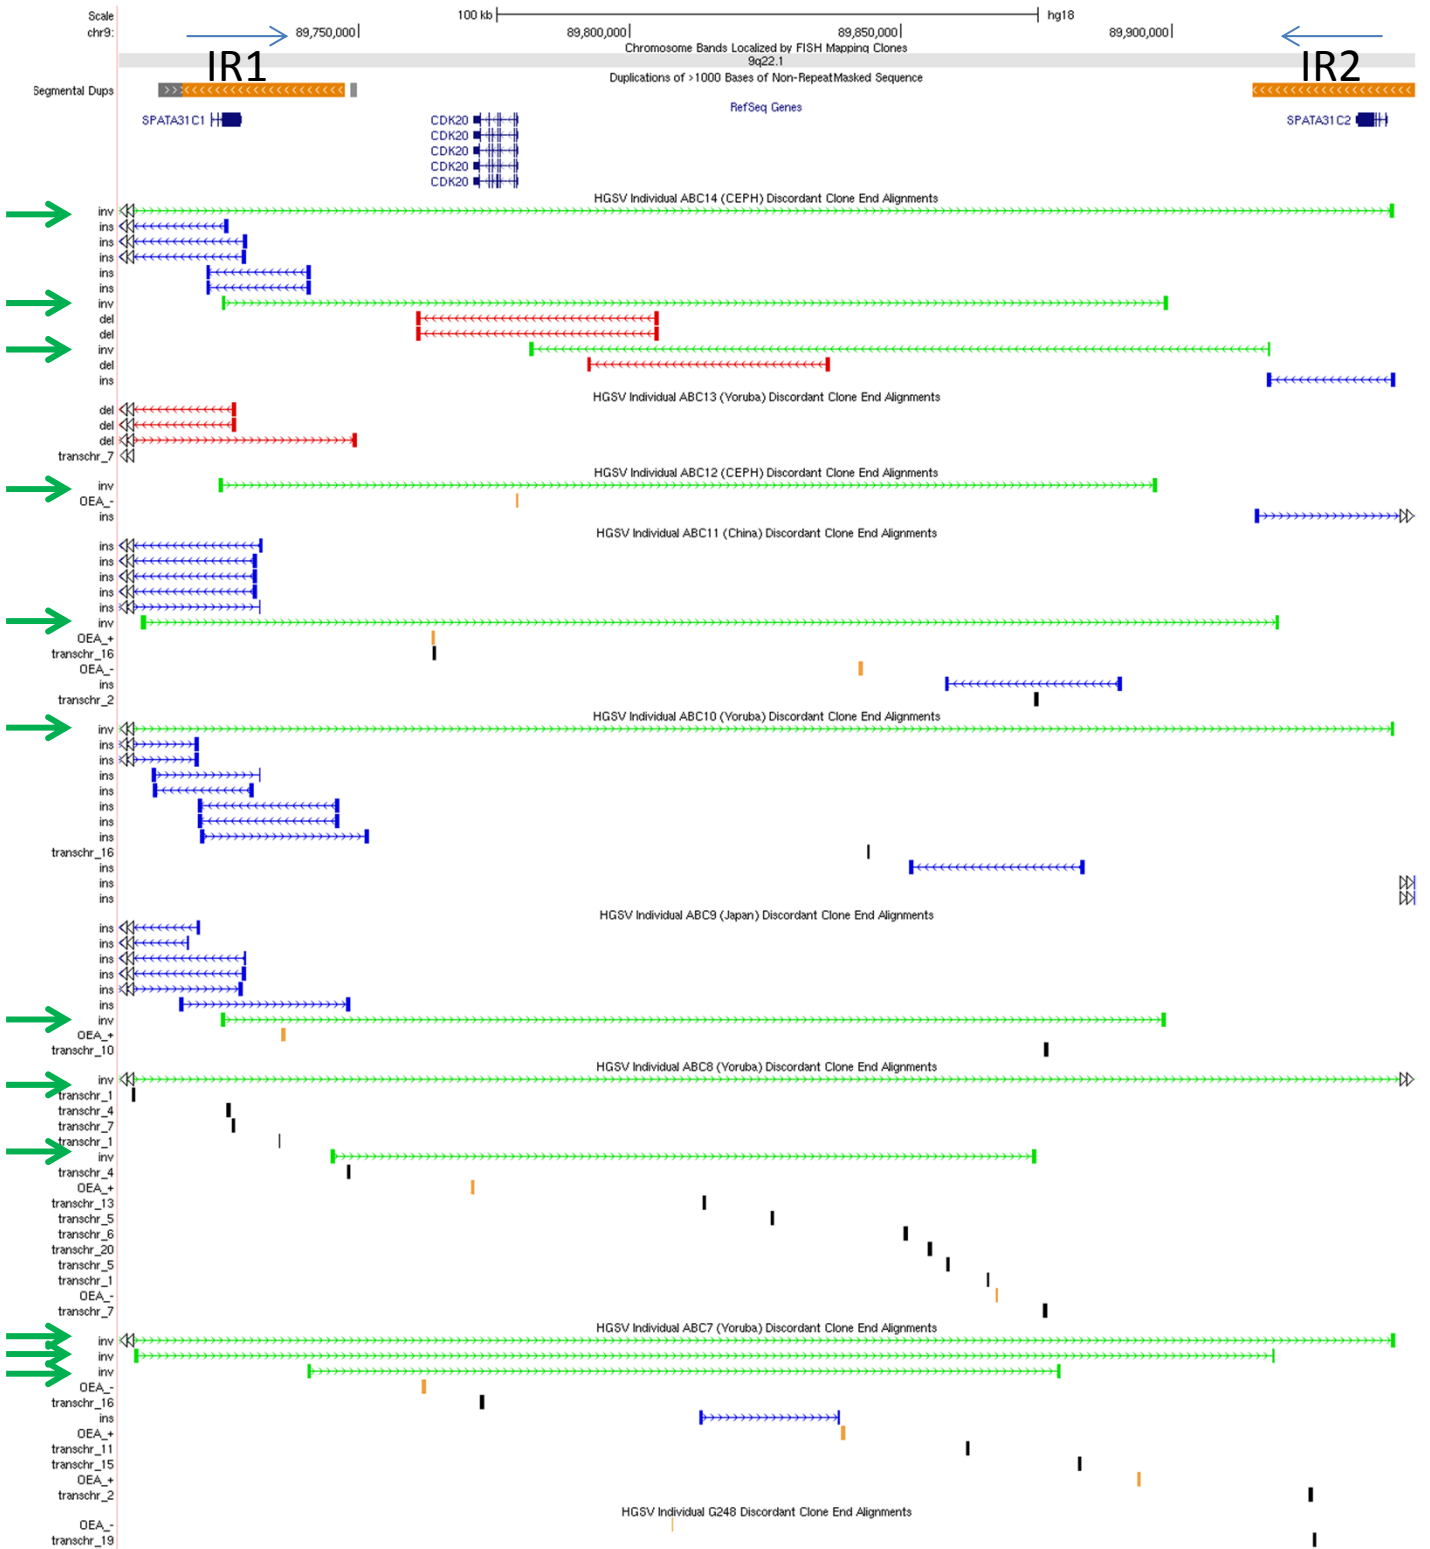

**Figure S3** - Human Genome Structural Variation Project (HGSV) discordant end alignment track at the UCSC website (hg18) for region chr9:89,705,673-89,944,931, corresponding to hg19 region chr9:90,515,853-90,755,111, suggests the presence of a polymorphic inversion between inverted repeats IR1 and IR2 (each represented by the orange rectangles at the segmental dups track). Seven out nine fosmid libraries have clones that map to the potential inversion breakpoint as indicated by the green arrows on the left. Each fosmid library was constructed using whole genome from individuals of distinct ethnicity<sup>1</sup>.

## BAB3922

146058913 AT-rich 146058977  
Ref\_c\_+ (+) AATGTTATTCTCTGTCAGCTCTTAATTTAA~~AAAAAATAAATTCCTATCATTATTTCTTGTAACTA~~  
BAB3922\_jct1 AATGTTATTCTCTGTCAGCTCTTAATTTAA~~AAAA~~**TTCAACACCGCTTCATGCTAAAAACTCTCAA**  
Ref\_d\_- (-) ATCTCAATAGATGCAGAAAAGGCCTTCAACA~~AAAA~~**TTCAACACCGCTTCATGCTAAAAACTCTCAA**  
146062931 L1PA7 146062867  
142273888 LTR 142273824  
Ref\_b\_- (-) TTACACATACGATTCAATTTCAGaCCATCTCTTTGTGAGTGCAT~~AAA~~ACTGAATGCTTTTCAGAAA  
BAB3922\_jct2 TTACACATACGATTCAATTTCAGtCCAT-TC~~cc~~-GT-AGTG--T**ACATGGCAAACCTCGTCTCT**  
Ref\_A\_+ (+) CAGGCAGATTGCTTGAGGTGAGGAGTTTGAGACCAGCCTGGCCA**ACATGGCAAACCTCGTCTCT**  
146062931 AluSx1 146062867

## BAB3923

125720115 LTR 125720051  
Ref\_b\_- (-) AAACACCCTGATAGACCCACCCAGAATAATGTTTAA**CCAAATATCTGAGCAGCCTGTGGCCAGCC**  
BAB3923\_jct2 AAACACCCTGATAGACCCACCCAGAtg~~cacc~~cagatg**CA**tCTGTGACAGATGCCGTTAGCAAGCA  
Ref\_A\_+ (+) CCTGGGACACTGTGCACCTGGCCAAGGGGAACAGGGT**CA**-CTGTGACAGATGCCGTTAGCAAGCA  
125698117 125698180

## BAB3924

98679030 98679094  
Ref\_c\_+ (+) ACTGTATCTAACCAGATTGGATTGACTTTTITAGCTCTTTTGATTAATAATTCATAAACCTGAGGA  
BAB3924\_jct1 ACTGTATCTAACCAGATTGGATTGACTTTT**TTT**TATCTTGAGGACATTAGGAATGGGGCTGGAAAGT  
Ref\_d\_- (-) GGGGCCAGAAATATAAACTTTCTTCTAC**CTTT**TATCTTGAGGACATTAGGAATGGGGCTGGAAAGT  
98680656 98680592  
92782165 92782101  
Ref\_b\_- (-) ATTCTGCTAATTCCCACTCAAAGATGGCCA**AGGCT**GGAAGACAGAAATGGACAAAGCTCTGA  
BAB3924\_jct2 ATTCTGCTAATTCCCACTCAAAGATGGCCA**AGGCT**GAGACAGGAGAATGGCGTGAACCCAGGA  
Ref\_A\_+ (+) GTGGCGGGCGCCTGTAATCCAGCTACTTGGG**AGGCT**GAGACAGGAGAATGGCGTGAACCCAGGA  
92751225 AluY 92751289

## DECIPHER\_257814

11860718 11860654  
Ref\_c\_- (-) GCCCAAGGCCGTGGGATGGGAGAGGGTGGCAGGCATGCCAGGTAGAAGTAGGGAAGGGCTCTC  
257814\_jct1 GCCCAAGGCCGTGGGATGGGAGAGGGTGGCAGGC**CCAGGAGGGGAGTGGGTGATACAAAAGGAG**  
Ref\_d\_+ (+) GAGGAACAAAAGCTAGGGGTCGATGGTGGCAGGC**CCAGGAGGGGAGTGGGTGATACAAAAGGAG**  
11860047 11860111  
20573475 L2a LTR 20573538  
Ref\_b\_+ (+) AGGCTGTT**CAGACTAAGTCAGTGTAA**CAGTTA-**ACT**TATAACAAGAATGCTGCGTAA**CAAATAGC**  
257814\_jct2 AGGCTGTT**CAGACTAAGTCAGTGTAA**CAGTTAc**ACT**GTTTGGAA**TAAAGAGATGTAA**ACTCCAGT  
Ref\_A\_- (-) CAAAGGGAGGGTAGGGGAAGTAGCAAGCCTCCTGCT**GTTTGGAA**TAAAGAGATGTAA**ACTCCAGT**  
20574504 20574440

**Figure S4** – Color-matched sequence alignment of breakpoint junctions in rearrangements present in subjects BAB3922, BAB3923, BAB3924 and DECIPHER\_257814. Orange arrows indicate location of *de novo* point mutations or indels that were likely generated concomitantly to the complex rearrangement (DUP-TRP/INV-DUP + AOH). Red boxes in BAB3923 sequencing data highlight the repetitive sequence CACCC and CACCCAGA; this latter sequence may have been copied *de novo* to jct2 along with the insertion of the dinucleotide TG. jct1: breakpoint junction 1; jct2: breakpoint junction 2. Genomic reference segments (Ref) are named according to the structure shown in Figure 1 (main text). Microhomology at the junctions are represented as bold underlined letters.

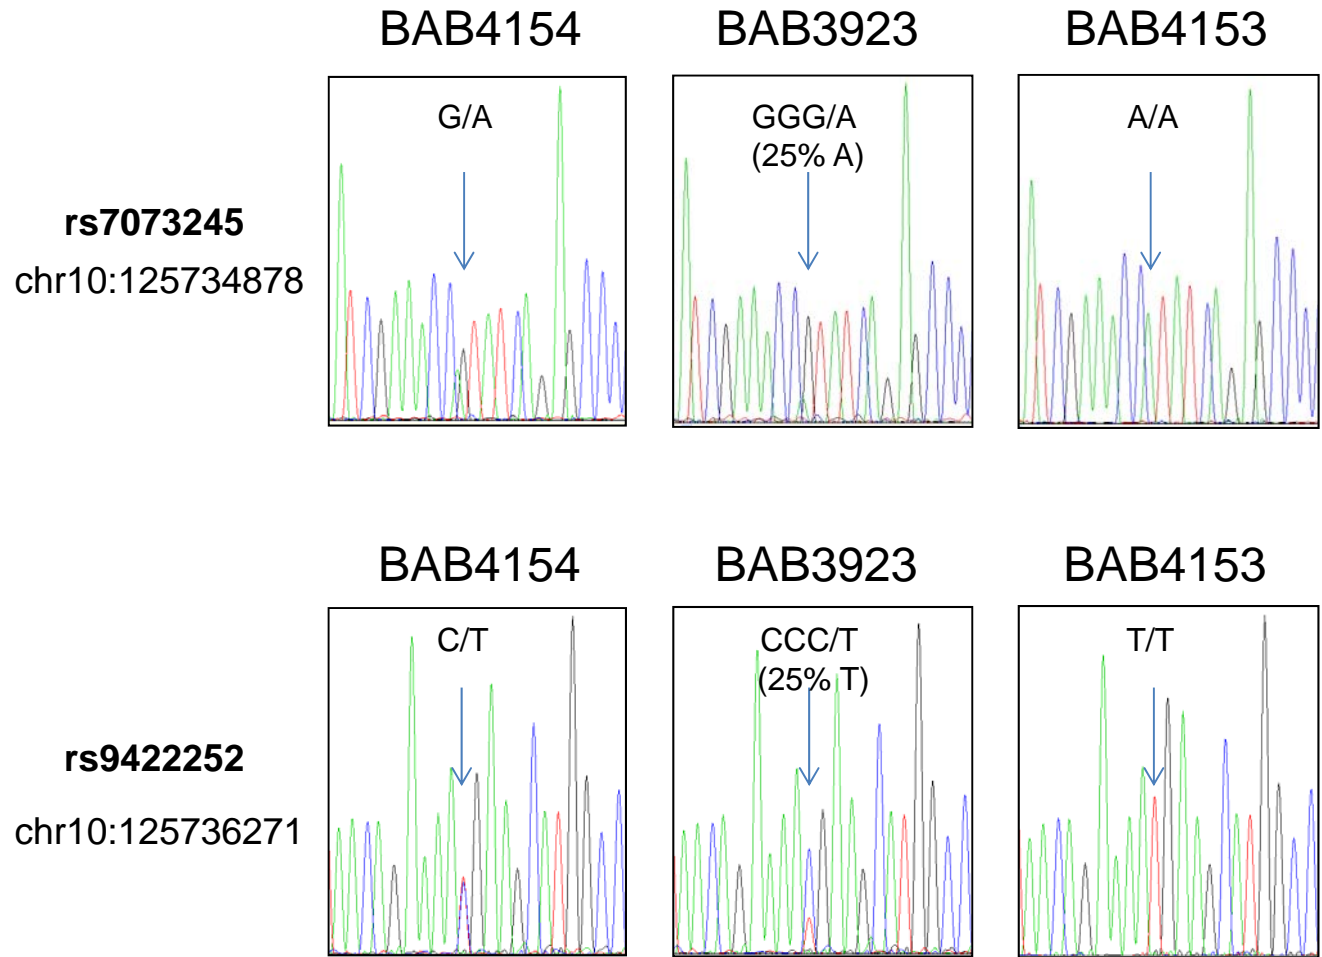

**Figure S5-** Sanger sequencing result of SNPs rs7073245 and rs9422252 from family trio (BAB3923, BAB4153-mother, BAB4154-father) both of which had shown inconsistent inheritance in the Affymetrix platform. Alleles inherited from father are consistently detected in higher quantity (G and C, respectively) indicating unequal allele dosage within part of the triplicated segment. These results support formation of jct3 in BAB3923 (see main text for details).

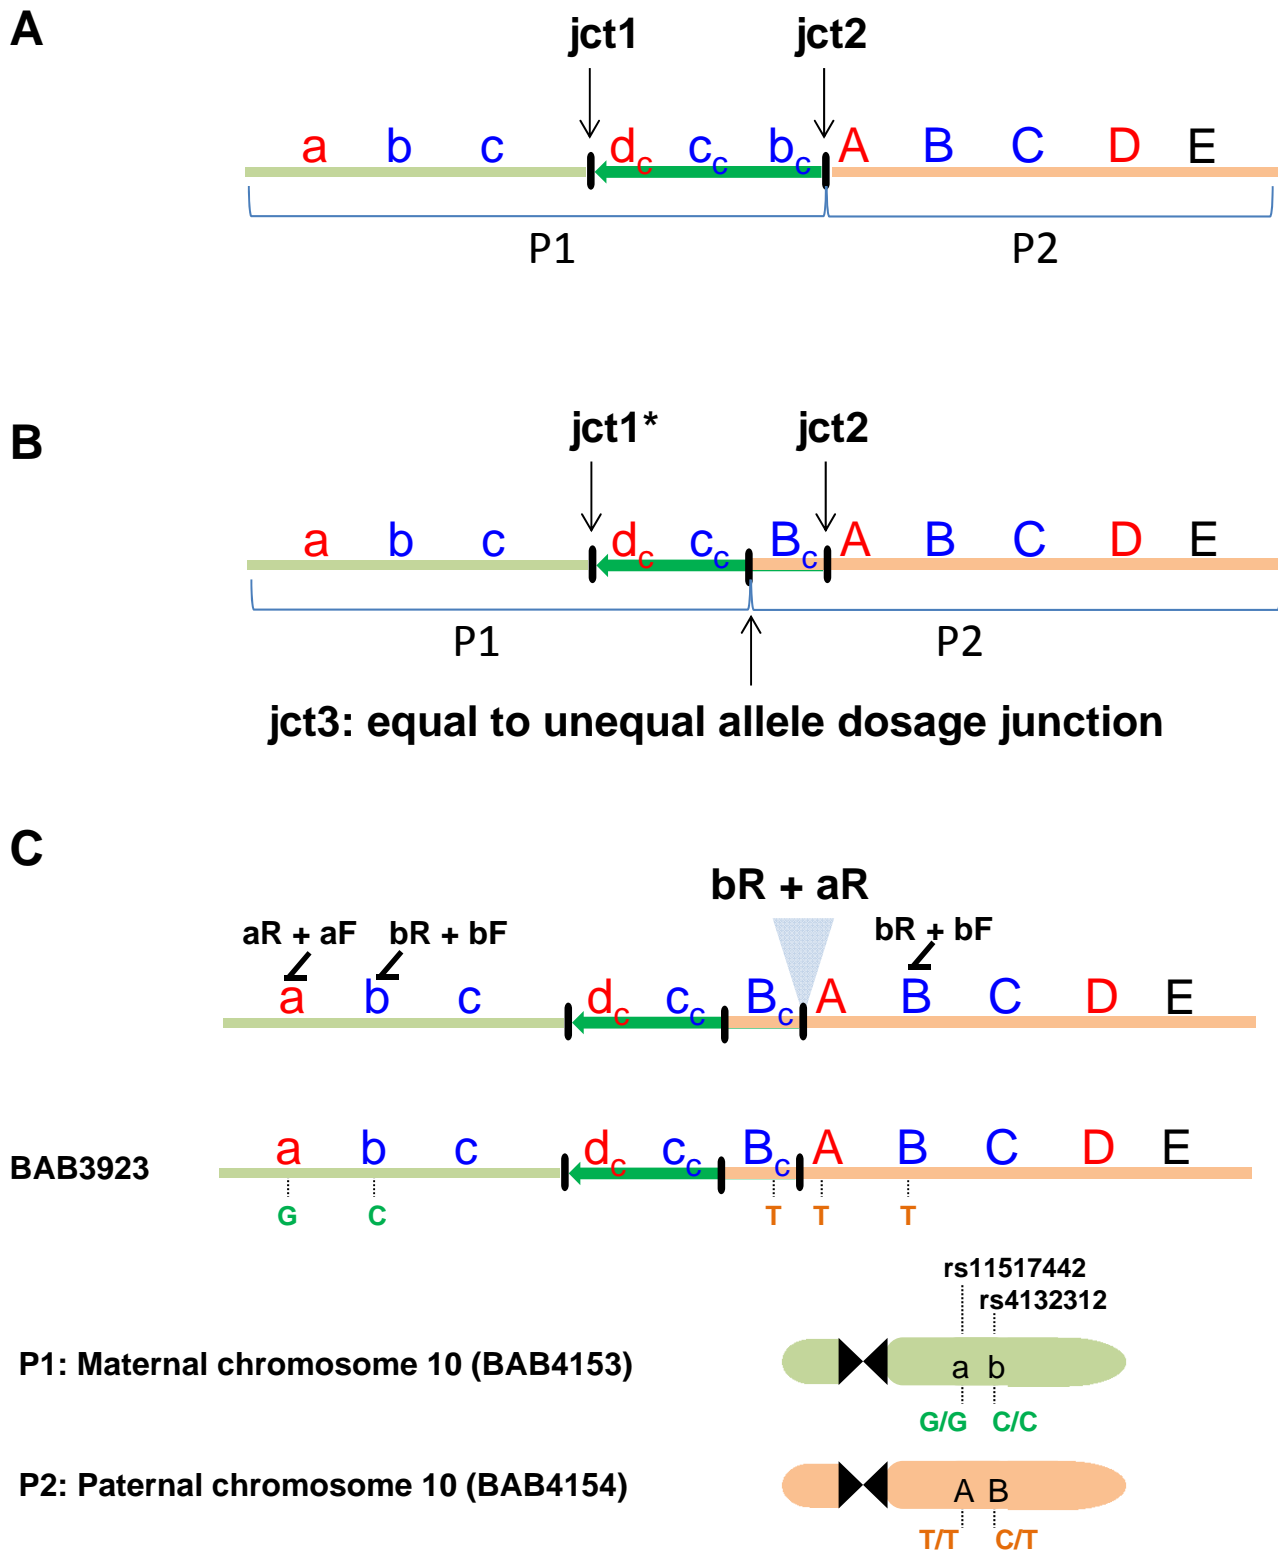

**Figure S6- (A)** DUP-TRP/INV-DUP model predicts formation of at least two breakpoint junctions in subject BAB3923 as a result of two template switches (refer to Figure 1, main text). **(B)** Analysis of allele peaks and B-allele frequency for BAB3923 subject from Affymetrix and Illumina SNP array platforms, respectively, shows evidence for at least one additional junction (jct3) within the triplicated segment. **(C)** Sanger sequencing of SNPs rs11517442 and rs4132312 in parents and index subjects shows that both segments that form BAB3923 jct2 were inherited exclusively from father, supporting the hypothesis that jct2 is intrachromosomal in this subject as opposed to be interchromosomal as expected from model in **(A)**. aR + aF and bR + bF: PCR products of the ancestral segments involving in the formation of jct2; bR + aR: BAB3923 breakpoint junction PCR specific product. For BAB3923, jct1\* was inferred from high-density custom array CGH. P1 and P2: inherited parental homologous chromosomes.



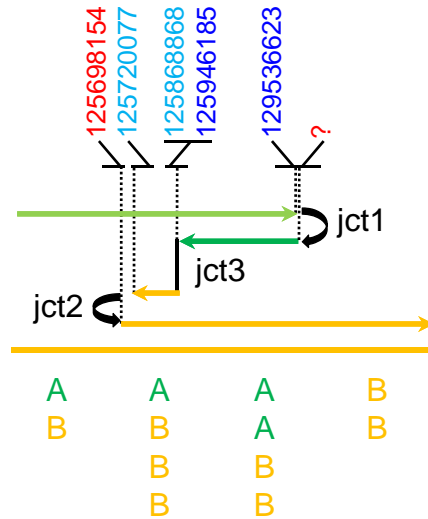

**Figure S7:** Color-matched schematic representation of alterations observed in chromosome 10 of subject BAB3923 using SNP array and aCGH platforms plus Sanger sequencing for jct2 (refer to the main text for details and Figure 1 for model). BAB3923 is hypothesized to have at least three breakpoint junctions generated by template-switching during a replication-based repair (Figure S6). Top: genomic coordinates (hg19) of breakpoint junctions in chromosome 10 inferred from techniques: jct2: sequencing data is shown in Figure S4; jct1 was inferred from high-density aCGH; jct3 was inferred from Illumina SNP array. Red represents duplicated segment; light blue represents triplicated segment harboring unequal allele dosage; dark blue represents triplicated segment harboring equal allele dosage; ?: duplication junction is hypothesized but genomic coordinates are unknown. Bottom: expected allele distribution in distinct segments of the CGR in a SNP array platform.

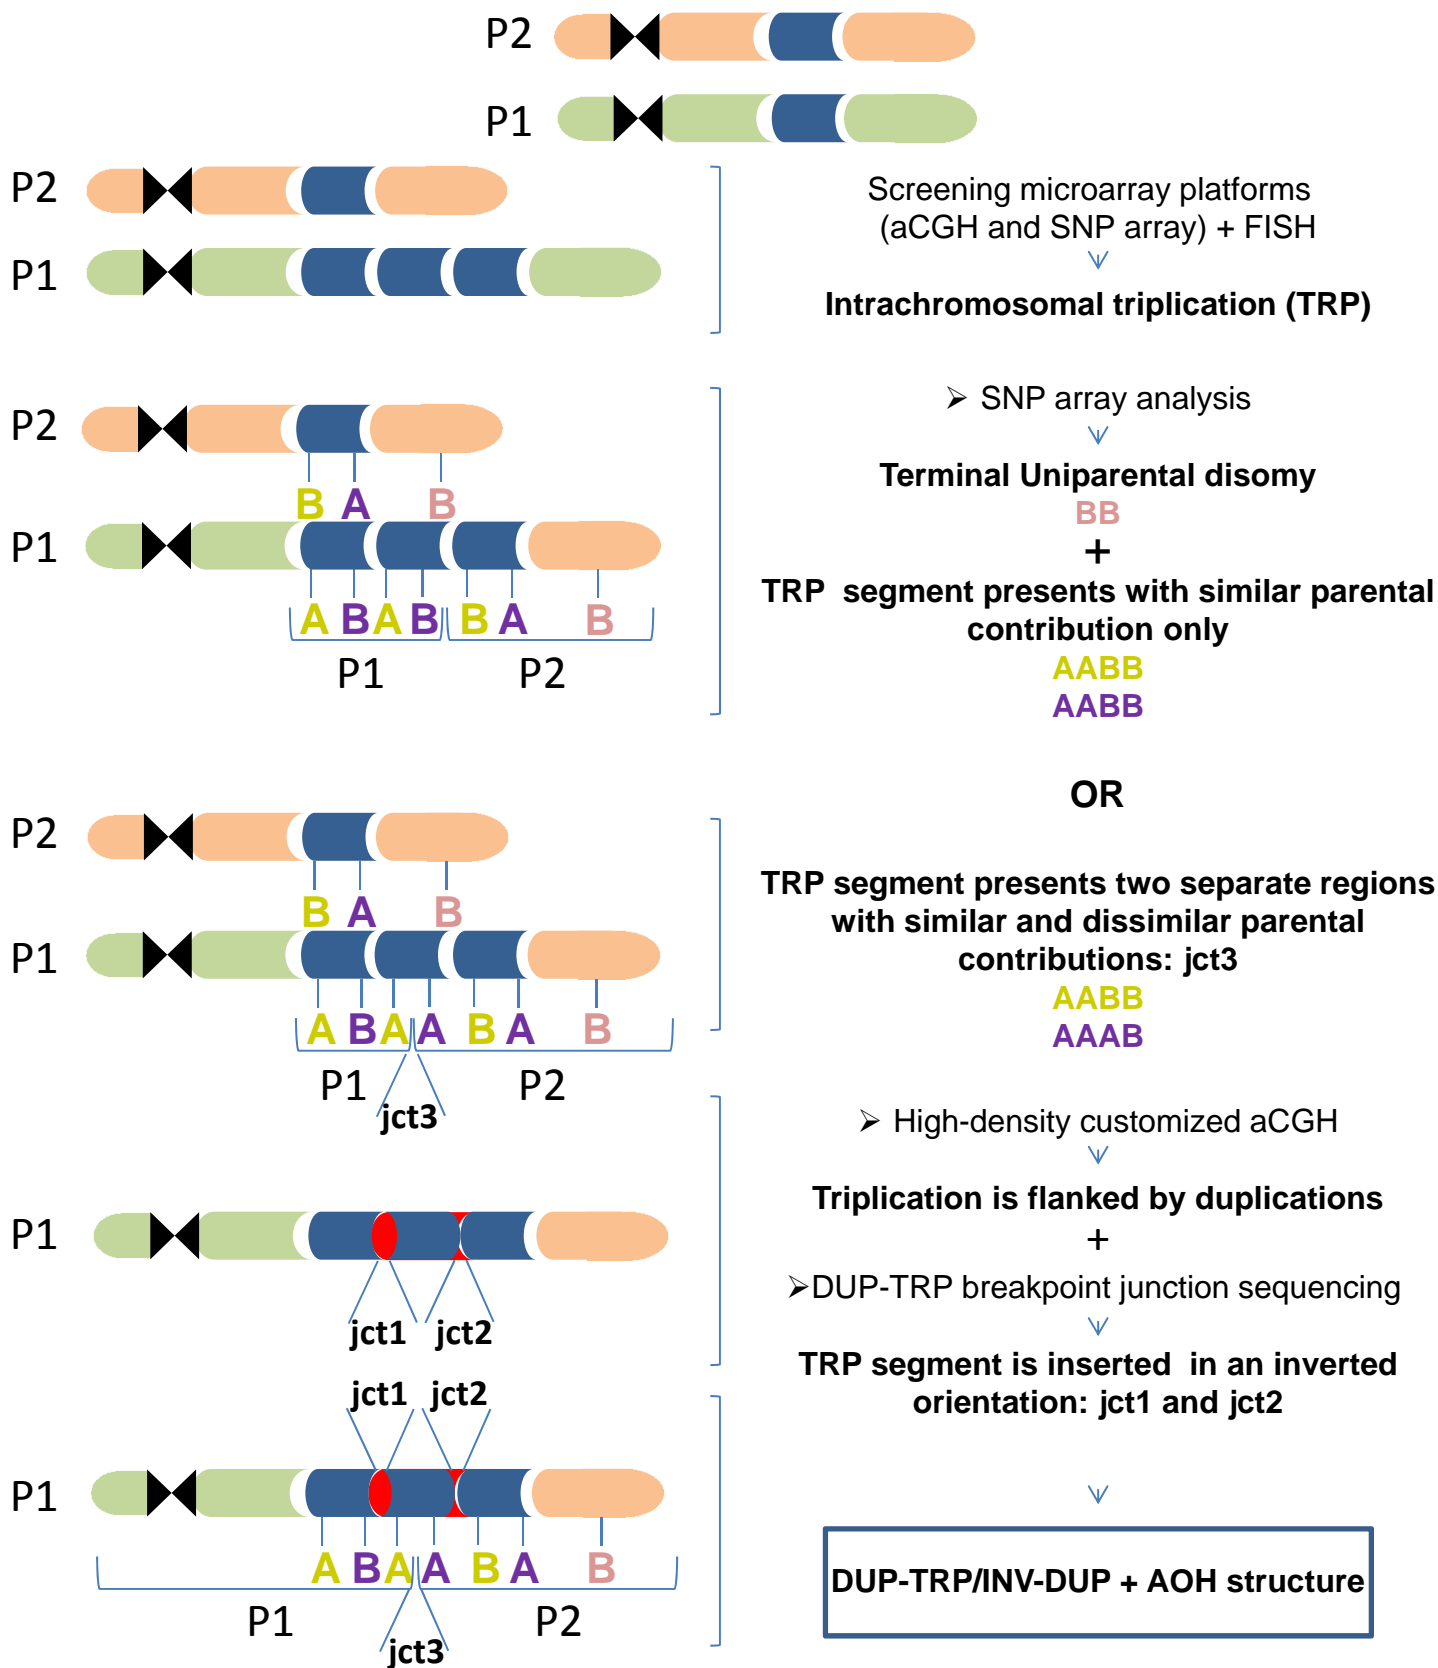

**Figure S8-** Schematic representation of techniques used to study triplications followed by absence of heterozygosity (AOH). Multiple layers of complexity were unveiled using diverse molecular tools as follows: screening SNP or CGH array platforms, FISH, high-resolution customized aCGH, long-range PCR followed by Sanger sequencing of CGR breakpoint junctions. P1, P2: parental homologous chromosomes; jct: breakpoint junction. Blue segment represents triplication; red segment represents duplication; A, B: SNP alleles. Jct3 were observed in two individuals only (BAB3923 and DECIPHER\_257814)

## Supplemental reference

1. Kidd, J.M., Cooper, G.M., Donahue, W.F., Hayden, H.S., Sampas, N., Graves, T., Hansen, N., Teague, B., Alkan, C., Antonacci, F., et al. (2008). Mapping and sequencing of structural variation from eight human genomes. *Nature* 453, 56-64.
